# Supplementary material
Source: Research Square preprint supplement (doi:10.21203/rs.3.rs-8796566/v1)
Supplement: Supplementary file 1 [file 21581718d89f0dead94aaa49.docx]

**Patient Support Coordinator (PSC) Intervention Handbook**

# Introduction

## Aims

This intervention is a multi-session, semi-structured supportive listening programme embedded in outpatient oncology, designed to

1. Deliver timely psycho-emotional and practical support to patients, and
2. Facilitate a progressive exploration of values and care priorities to inform serious illness communication with their oncologists.

*This document serves as a quick guide on intervention components and a high-level overview of their suggested sequencing. The outline presented below should be flexibly adapted to meet the needs and pacing preferences of each patient, and is not intended to be manualized framework for patient engagement.*

## Intervention parameters

- Delivery by trained non-clinician PSC, supervised by supportive care team.
- Format: 1 introductory session + up to 8 follow-up sessions over 3 months, ~45-60 mins per session, in-person or via institutionally approved teleconferencing software.
- Approach: Flexible sequencing and pacing based on patient readiness, prioritizing psychological safety.

## Foundations of intervention delivery

This supportive listening intervention is underpinned by and structured around three ethical commitments:

1. **Respect for individual autonomy** – Encourage patients to set the agenda for each session, and remind them that the intervention should proceed at a pace that is comfortable for them.
2. **Person-centeredness** – Recognize and accept that what matters to patients may not be relevant to or fit within the structure of a Serious Illness Conversation, and encourage patients to explore and reflect on what is most salient to them at any given moment.
3. **Epistemic pluralism** – Adopt a position of openness to patients’ perspectives, illness narratives, and beliefs that may not always cohere with biomedical conceptions of health and illness, *unless* such beliefs subject patients or others to risk of harm.

## Scope of work

The PSC is a non-clinician who operates at the interface between patients and the clinical team, offering continuity of care, supportive listening, and facilitation of values- and goal-oriented reflection, while remaining within defined non-clinical and non-diagnostic boundaries.

The PSC role complements clinician-led serious illness conversations, preparing them emotionally and cognitively for such discussions and conveying patient-derived insights to clinicians to support further exploration.

| Core domain | Primary function | Tasks/ responsibilities |
| --- | --- | --- |
| Relational engagement | Establish and maintain a trusting, psychologically safe relationship that enables patients to speak openly about their experiences, concerns, and priorities. | - Build rapport and continuity across multiple encounters - Create a calm, respectful, non-judgmental conversational space - Attend to emotional cues, silence, ambivalence, and uncertainty. - Normalize distress as a common response to serious illness. |
| Distress screening | Identify emotional, physical, and practical concerns early and facilitate timely support. | - Administer structured Distress Thermometer screening tool at the start of each session - Explore patient-reported concerns and document clinically relevant information. - Provide basic, non-prescriptive education and practical guidance within an approved scope - Escalate concerns appropriately to oncologists, Supportive Care Nurse, psychosocial services, or other clinicians. |
| Goal-oriented support | Support patients in identifying and pursuing personally meaningful goals that enhance the quality of life, their sense of control, and their engagement with care. | - Facilitate patient-led identification of meaningful goals. - Support reflection on motivation, feasibility, and barriers. - Review progress and adapting goals in response to changing health status. - Use goal pursuit as a means of strengthening agency and grounding values exploration. |
| Meaning-making facilitation | Help patients articulate what matters most to them and how illness intersects with their sense of self, priorities, and meaning | - Facilitate reflection on values, roles, identity, and sources of strength. - Explore hopes, worries, and definitions of quality of life. - Support meaning-making without imposing interpretive frameworks. - Hold space for existential concerns when raised by patients. |
| Communication facilitation | Support oncologists and clinical team by relaying information pertinent to care/ treatment planning and decision-making. | - Document key discussion findings in EHR system. - Distil and synthesize most relevant insights into patient priorities, goals, and values into a structured document for sharing with clinicians. - Inform patients that information and concerns deemed relevant to their care will be shared with their primary oncologists. - Flag issues of concern to primary oncologists. |

## Professional boundaries

To ensure patient safety and program sustainability, boundaries should be actively maintained through training, supervision, structured referral pathways, and explicit communication with patients/ patients and clinicians about the nature and limits of the PSC role.

The table below outlines activities that fall outside of the scope of the intervention, as well as inappropriate behaviors that undermine patient autonomy, safety, and trust, and which should trigger remediation.

| Core domain | Out of scope | Inappropriate behaviors |
| --- | --- | --- |
| Relational engagement | - Interpret emotional content through psychotherapeutic frameworks - Apply formal therapeutic methods and techniques (e.g. exposure therapy, trauma processing) and provide psychotherapy or counseling. | - Present oneself as a therapist, mental health professional, or clinician. - Invite emotional disclosure in a way that feels coercive, intrusive, or agenda-driven (e.g. enquiring into patients’ childhood experiences) - Frame emotional expression as necessary, therapeutic, or preferable - Encourage dependency and unscheduled contact. - Attempt to repair, resolve, or mediate family or relational conflicts. - Take sides in interpersonal conflicts with family members or clinicians. |
| Distress screening | - Use diagnostic labels to name patients’ emotions or emotional states. - Provide crisis intervention, suicide risk assessment, or safety planning. - Interpret distress scores clinically. - Develop coping plans resembling treatment protocols. | - Reassure patients that distress is normal in a way that dismisses or trivializes suffering - Provide advice that could be construed as medical, pharmacological, or prescriptive. - Direct patients to engage in behavioral change. - Imply or frame distress as a moral failure/ failure of coping or as a problem with patient’s mindset. |
| Goal-oriented support | - Design action plans, routines, and adherence strategies. - Monitor performance or progress in a prescriptive manner. | - Impose goals on patients or steer patients towards specific goals. - Blame or imply shame in patient’s disengagement from goal. - Treat goal achievement as psychological improvement. |
| Meaning-making facilitation | - Deliver existential, spiritual, or narrative therapy - Use established or protocolized therapeutic models to facilitate meaning-making. | - Suggest patients should find meaning or growth. - Impose coherence or resolution. - Use meaning-making to steer patient towards end-of-life discussions. |
| Communication facilitation | - Act as clinical advocate or negotiator on behalf of patients and/or their family members. - Mediate disagreements between patients and clinicians. | - Represent patient preferences as final and binding to clinical team. - Present personal interpretation as patients’ views. - Overinterpret or sanitize/ curate patient perspectives to fit opinion of patient’s goals, needs, and personality. |

## Indicative intervention structure

The figure below shows an indicative session timeline. Note that the intervention is deliberately designed to be semi-structured and patient-led, with session content, pacing, and emphasis shaped by the patient’s expressed needs, readiness, and evolving circumstances. The sequencing shown is therefore suggestive, not prescriptive.


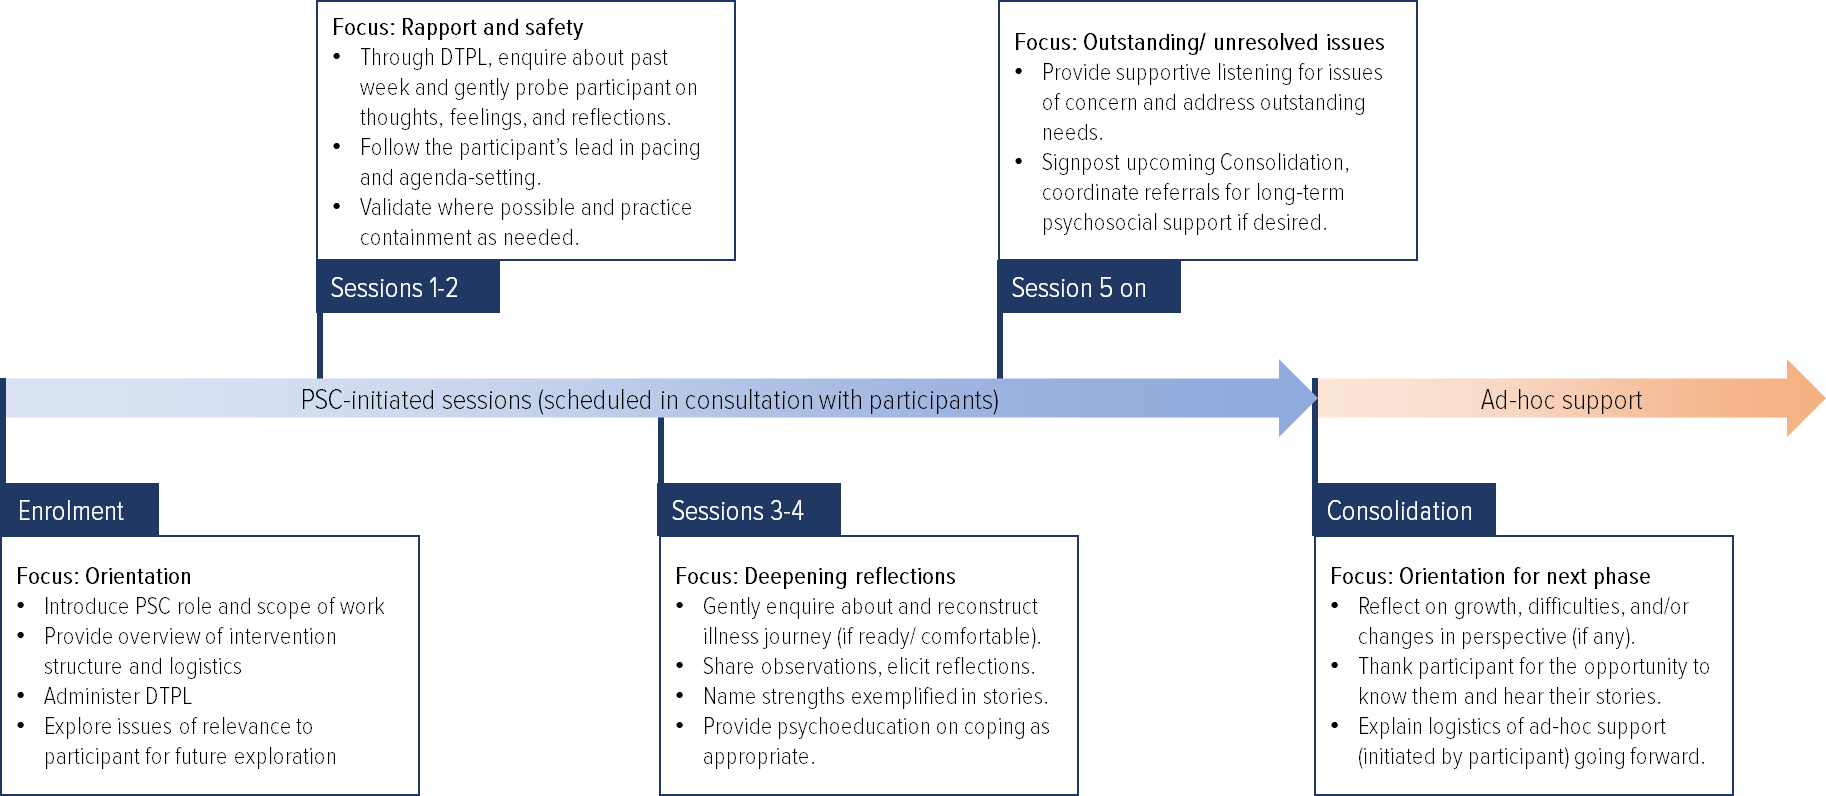


# Distress screening and symptom management

The Distress Thermometer Problem List is a brief screening tool designed to help identify levels of emotional distress and the various concerns that may be contributing to it.


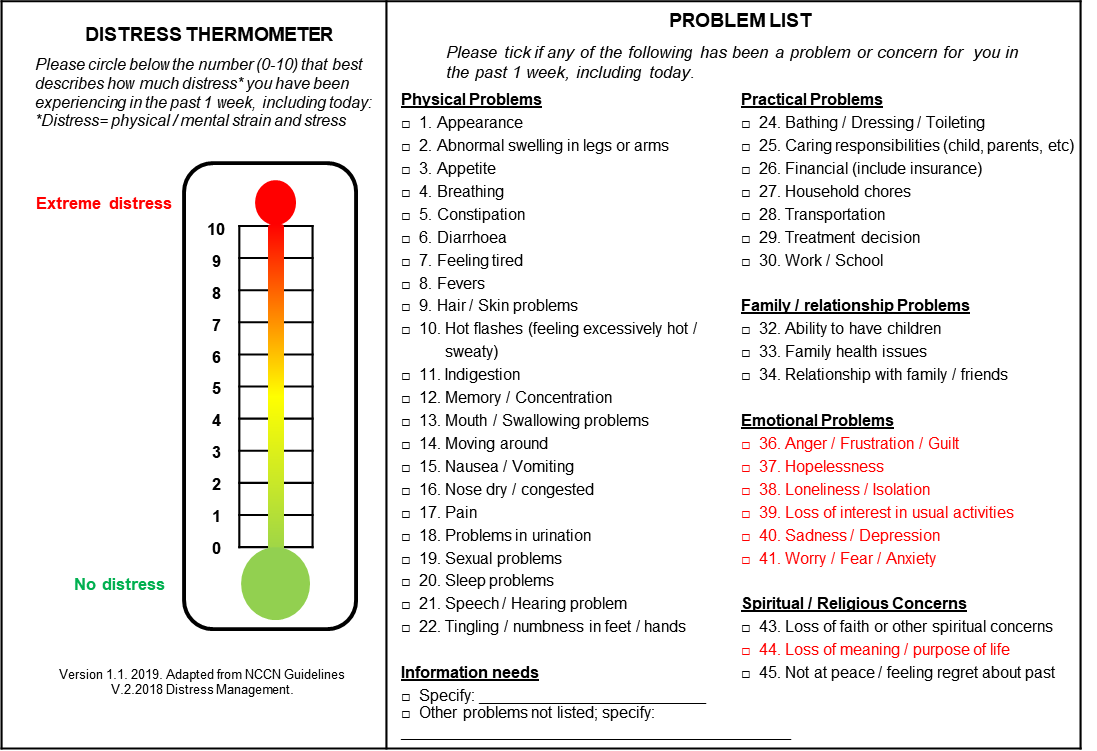


## Administering the DTPL

- Ask the patient to rate how distressed they have felt in the past week on a scale of 0 (no distress) to 10 (extreme distress). *Note: Some may misunderstand how the scale, so check back and verify if necessary.*
- Ask them what has been bothering them, and if appropriate, use to Problem List to prompt or guide the conversation: “Let’s take a look at some of the areas that might be affecting how you're feeling.”
- Ask questions about specific concerns and challenges they are facing

## Things to do after administering the DTPL

- Validate the patient’s experience though empathetic listening and reflection; acknowledge the legitimacy of distress.
- Offer appropriate support, either through basic psychoeducation, symptom tips, or referral to other supportive care services within scope.
- Escalate if distress is high and persistent, and patient expresses hopelessness, suicidal ideation, or unmanageable symptoms.
- Document DT score and problems.

## Assessment of symptoms and distress

| Issue | Questions |
| --- | --- |
| When did the issue arise? | - When did this first start? Has it been constant or does it come and go? - How often do you notice this happening—daily, weekly, or less often? - What are you doing when this takes place? What happens before you feel this [sensation/ symptom]? - What is the baseline level of [sensation/ symptom] you experience/ are used to experiencing? |
| Where is it experienced? | - Where is this [sensation/ symptom] experienced? (Which side?) - Do you have any other symptoms that happen together with this? |
| What is its impact? | - On a scale of 0 to 10, where 0 is no [pain], and 10 is the worst imaginable, how would you rate it? - How has it affected your daily life? Is this making it harder for you to do things you usually do, like eating, sleeping, or going out? |
| How is it addressed? | - Have you spoken to your doctor about this? - How are you coping with this problem? - Have you tried anything to relieve or manage it? Has anything helped? - Would you be open to us referring you to someone from the supportive care team who might be able to help? |

## Clinical red flags

| Type | Red flags | Next steps |
| --- | --- | --- |
| Physical | - Fever ≥ 38 degrees - Unusual bleeding - **New** or **worsening** physical symptoms - Symptoms **not relieved** with treatment - Symptoms **affecting daily activities**, e.g. eating, sleeping, moving about | - Advise patient to seek medical attention (Chemo Review Clinic if patient is on chemo or ED if after office hours) - Offer SCN support. - If patient declines SCN support, advise patient to inform Dr at next TCU. - Provide useful contacts and education resources specific to symptoms. |
| Psychological or existential | - **Anxiety or low mood** interfering with daily life - **Severe sleep problems** for at least 2 weeks - **Fear, panic, or dread** that interferes with treatment - Uncontrollable, frequent **mood swings** - **Loss of interest** in daily activities - Feeling **sad most of the time** in the last 2 weeks | - Offer SCN support if concerns are related to treatment and physical symptoms. - Offer referral to psychosocial services. - If patient declines SCN support, advise patient to inform primary oncologist at next appointment. |

## Signs of potential medical emergency

If patients report the following, advise them to seek immediate medical attention:

| - **Back/ neck pain with neurological signs**, i.e., radiating to legs, causing weakness, numbness (band-like trunk pain, constricting sensation around torso), gait instability, or bladder/bowel incontinence. - **New or worsening breathlessness, persistent cough** (especially with hemoptysis), or **pleuritic chest pain** (sharp, stabbing pain in a specific area of the chest that worsens with breathing, coughing, or sneezing) - **Chest pain with shortness of breath or palpitations** (may be serious cardiac or pulmonary pathology) - **Severe GI symptoms**: vomiting >2 times/day, constant diarrhea with dehydration signs, or constipation >3 days with pain, vomiting, or discomfort/ distension |
| --- |

## Symptom management advice

| Symptom | Lifestyle advice | Psychoeducation |
| --- | --- | --- |
| Fatigue | - Encourage gentle physical activity (e.g., walking, stretching, yoga) to improve energy levels. - Maintain consistent sleep-wake routines. - Avoid long daytime naps, which can disrupt night sleep. | - Normalize fatigue as a common, expected side effect. - Validate emotional impact (frustration, guilt). - Teach pacing strategies: “Plan, Prioritize, Pace”, anticipate energy fluctuations and schedule accordingly, break down steps into smaller tasks, focus on what’s important, take more breaks, modify activities. - Emphasize self-compassion—rest is a form of healing, not weakness. |
| Nausea/ vomiting | - Eat small, bland, frequent meals. - Avoid strong smells and greasy, spicy foods. - Stay upright after eating; avoid lying down immediately. - Check if patient is using nutritional supplements. | - Reassure that antiemetics are effective for most. - Encourage patient to speak to doctor about pre-emptive/ prophylactic antiemetics. - Ask patients to request medication changes if nausea persists. - Suggest trying out ginger tea for nausea relief. - Address anxiety and conditioning effects that can trigger anticipatory nausea. |
| Neuropathy | - Avoid tight footwear and exposure to extreme temperatures. - Use assistive devices if balance or dexterity is affected. | - Explain that some symptoms may improve post-treatment, though not always fully reversible. - Explore symptom progression. - Encourage patient to report symptom to doctor and explore dose adjustments. - Emphasize safety: fall prevention, avoid burns, careful with cooking or tasks requiring fine motor skills. - Encourage engagement in mind-body exercises (taichi, yoga, Pilates) |
| Mucositis | - Recommend Oral 7 for dry mouth or ulcers - Avoid acidic, spicy, or hard foods. - Use soft toothbrush and maintain oral hygiene. - Ensure adequate hydration and nutrition (may require soft or liquid diet). | - Explain mucositis as a common chemo-related effect due to damage of mucosal lining. - Reassure that symptoms usually resolve post-chemo cycle. - Encourage prompt reporting of mouth sores or bleeding. |
| Diarrhea | - Avoid caffeine, dairy, greasy or high-fiber foods. - Explore dietary triggers and changes. - Increase fluid intake with oral rehydration salts or isotonic drinks. | - Check baseline stool consistency and BO frequency - Check if patient is using antidiarrheals (e.g. loperamide), and encourage reporting to oncologist. - Encourage early reporting to avoid complications. - Normalize embarrassment and provide guidance on bowel management. |
| Constipation | - Encourage high-fiber foods if tolerated (fruits, vegetables, oats). - Increase fluid intake and gentle physical activity. - Prune juice if patient does not have diabetes (else moderate intake) | - Check baseline BO frequency and whether BO feels complete - Encourage sticking to a routine for using the toilet, but not ignoring urges. - Destigmatize discussion of bowel symptoms. - Encourage patient to speak to oncologist about laxatives and stool softeners. |
| Chemo fog | - Use memory aids (journals, calendars, to-do lists). - Prioritize tasks; avoid multitasking. | - Normalize “chemo brain” as a recognized phenomenon. - Reassure that most symptoms generally improve post-chemo. - Address frustration and impact on identity/ function sensitively. |
| Generalized pain and discomfort | - Gentle movement and physiotherapy to prevent deconditioning. - Offer referral to SCN for assessment and/or rehab medicine. - Heat packs or massage, where appropriate. | - Teach pain tracking: location, triggers, relief measures. - Acknowledge emotional burden of chronic pain - Introduce relaxation or mindfulness techniques if appropriate. |

# Supportive Listening

Supportive listening is a foundational competency of the PSC role. The aim in offering supportive listening is not to elicit disclosure, resolve distress, or guide patients toward specific insights, but to offer a reliable, attentive, and non-judgmental presence in which patients can express about what they are experiencing and what matters to them.

In the context of serious illness, being listened to without interruption, evaluation, or pressure is itself a meaningful form of support. Supportive listening creates psychological safety, fosters trust, and lays the groundwork for later reflection on goals, values, and care priorities.

## Core principles

1. Presence – Being with the patient is more important than doing something for them or dealing with the issues they bring up. Allow the conversation to unfold without rushing towards resolution, and resist the urge to solve problems, offer suggestions, or to fill silences.
2. Respect for readiness – Patients differ in what they are ready or willing to talk about at any given time. These boundaries should be respected.
3. Non-judgmental curiosity – A stance of openness towards all emotional expressions, however difficult or uncomfortable, helps patients feel safe in sharing their distress.

## Practice recommendations

The practice recommendations below are designed to support PSCs in navigating emotionally complex interactions with consistency and tact, and are offered as orienting principles rather than rules.

| Recommendation | What it means in practice |
| --- | --- |
| Practice containment | *Containment* refers to the capacity to receive, hold, and stabilize difficult moments without needing to resolve, interpret, or resolve them. In practice, this may mean:   - Allowing patients to express sadness, fear, anger, or uncertainty without moving the conversation towards insight or resolution. - Maintaining a calm, steady tone even when emotions escalate. - Regulate the pace and intensity of disclosure, e.g. by telling them that they need not say everything at once. - Helping the patients feel that their experiences can be spoken about without overwhelming the listener, demonstrating to them that these emotions are tolerable and shareable.   *Note:* Containment is particularly important at enrolment and for the first two sessions as the availability of an audience may prompt some to share distressing experiences quickly in a bid to ‘purge or ‘release’ their discomfort. Such sudden and intense outpourings may leave them feeling emotionally exposed, destabilized, and embarrassed after the fact. The benefits are conversely limited, leaving patients feeling worse off afterwards. |
| Using reflection as clarification | Use reflections to clarify and stabilize meaning, not analyze or expand it.   - Use key words and phrases that the patient used. - Check if your understanding is correct/ accurate. - Offer a tentative summary and identify one or two dominant themes that give shape to the patient’s account, but advance such syntheses as hypotheses. |
| Work with ambivalence and complex emotions | Patients may hold contradictory opinions or feelings about a given subject. Make room for such ambivalence without helping them come to a decision or egging them towards “moving forward.”   - Name ambivalence or explicate the duality of emotions (e.g. “There is a part of you that feels …, and there is another that feels…”) - Normalize ambivalence in light of the patient’s circumstances by situating it in the context of the broader narrative. |
| Mind one’s feelings and reactions | Supportive listening requires awareness of both the patient’s experiences and the listener’s internal responses. Self-awareness reduces the risk of enactment (unspoken, unconscious emotional dynamics being played out in interactions). PSCs should:   - Notice urges to reassure, advise, rescue, or change the subject. - Observe their own emotional reactions (e.g. protectiveness, helplessness, irritation, empathic sadness, numbness), and recognize these as signals. - Stay curious about one’s own reactions, thought patterns, and assumptions about the patient, share one’s reflections during supervision. - *Outside the intervention, take regular breaks, avoid back-to-back sessions especially if they are emotionally heavy, and seek social support from peers or clinical supervisor (upholding patient confidentiality as needed).* |

## Conversational pitfalls

This section outlines common conversational pitfalls that may arise in supportive care encounters and highlights practices that can inadvertently undermine containment, patient autonomy, or role clarity.

- Asking too many follow-up questions in emotionally charged moments.
- Filling silence, offering reassurance, or attempting to fix patient’s problems due to personal discomfort or anxiety.
- Premature normalization of distress (“many patients feel this way”) without attending to the uniqueness of individual experience.
- Airbrushing patient’s account of a given issue, e.g., giving a positive spin to what is a difficult experience for the patient, or reinterpreting/ reframing the account in a way at odds with the tone and tenor of the narrative.
- Recycling stock phrases and questions to encourage reflection and stimulate discussion.
- Presenting one’s recommendations as authoritative, necessary, or superior to the patient’s approach or preferences.

## Question guide

The questions below are provided **solely as a reference** to illustrate the types of conversational directions that may arise in PSC-patient interactions. They are not intended to be used as a script, checklist, or interview protocol, nor are PSCs expected or encouraged to ask all of the following questions or to raise them in the order presented below.

Supportive listening is grounded primarily in presence, attunement, and relational safety, rather than asking the ‘right questions.’ The quality of attention, pacing, and responsiveness to the patients’ cues is much more important than covering certain topics or prompts. PSCs should therefore:

- Follow the patient’s lead in determining what is discussed and at what depth.
- Use the questions below sparingly, purposefully, and strategically, only where they are deemed to help the patient.
- Allow conversations to be open-ended, unstructured, emergent, and radically different from the shape and flow of the questions presented below.

The question guide should be understood as a **conceptual scaffold** and tool for orienting PSCs to possible directions that conversations may take. It may be also used as **reflective aid** to facilitate ideation, learning, and self-assessment before or after sessions, not as a discussion guide to be consulted during PSC-patient sessions or as a rubric against which one’s performance is evaluated.

| Conversation function | Focus area | Sample questions |
| --- | --- | --- |
| Gathering background information/ performing intake | Getting to know what troubles the patient most | - “What has been weighing on your mind?” - “Of all the things you’re dealing with, what feels hardest these days?” - “What tends to come to mind when things feel hard/ overwhelming?” |
| Understanding the patient’s social support system | - “Is there someone you trust and feel safe around to share these concerns of yours?” - “When things feel difficult, who do you usually turn to for support?” - “How supported do you feel on a day-to-day basis?” - “What do you wish others understand about you or what you’re going through?” |
| Understanding how the patient wishes to be supported | - “What kind of support would feel most helpful to you at this point?” - “When you’re having a tough day, what do you really wish you get from others?” - “Is there anything you do not wish to talk about?” |
| Building safety | Seeking permission/ direction-setting | - “Would it be okay if we talked a little about [subject]?” - “Is this something you want to explore further today, or shall we leave it for now?” - “Does this feel like the right time for you to explore this?” |
| Tolerance and well-being check-in | - “How are you feeling now as we talk about this?” - “What would help you feel more settled/ more at ease today?” |
| Practicing containment/ making space to pause or slow down | - “It must be difficult to revisit [subject]. Would it help to slow down or to take a pause?” - “We don’t have to go any further into this right now. Would you like to take a breather here? We can come back to it another time.” - “We don’t have to fill the space with words. Would you like to sit in silence just for a while?” |
| Facilitating self-expression and/or meaning-making | Exploring values and identity | - “What would you want someone to know about you?” - “If you were to use three words to describe who you were before your diagnosis, what would you choose? - “How have these changed as a result of your illness?” - “Are there ways you still relate to/ connect with the ‘old you’?” |
| Tentatively highlighting themes in patient’s experiences for clarification | - “I’m noticing that you mentioned [theme] a few times. Does that connect with you?/ Does that feel important to you?” - “I may be off, but I’m hearing a lot about [theme]. Does that resonate with you?” |
| Fostering self-awareness | - “When you look back over this period, what stands out to you?” - “Have you noticed anything about how you respond when things get hard?” |
| Facilitating meaning-making | - “Do you find yourself making sense of what this journey/ experience has meant for you, or is this something you have not thought of?” - “Are there things that help you feel most like yourself/ give you a sense of meaning or purpose? What are they?” |
| Legacy and life review (*depends on patient readiness*) | - “Are there stories, values, or messages you want [specific loved ones] to have and hold on to?” - “What are some things you are most proud of?” - “Is this something you’d want to explore now, or perhaps later, or perhaps not at all?” |
| Holding space | Exploring coping without judgment | - “How have you been getting through things so far?” - “What do you find yourself doing when things feel especially hard?” |
| Understanding how coping has served the patient | - “How has that way of coping helped you?” - “What has it allowed you to get through? How has it protected you?” |
| Holding space for grief or anticipatory grief | - “Are there losses you find yourself thinking about, even quietly?” - “What do you find yourself missing the most?” |
| Holding space for illness-related anxieties | - “Are there worries that tend to come up for you, especially at certain moments?” - “What feels most uncertain or unsettling right now?” |
| Holding space for avoidance (without compelling change) | - “Are there things you prefer not to think about right now?” - “How has keeping some distance from these thoughts helped you cope?” - “We don’t need to change anything right now. Does it feel okay just to notice this for now?” |

## Integrating SICG questions into supportive listening

In the PSC intervention, SICG questions are not and should not be used as a structured conversation guide. Instead, selected SICG domains may be gently woven into ongoing supportive listening when they naturally align with what the patient is already expressing or is interested in exploring.

SICG questions are therefore used sparingly, tentatively, and only when they serve understanding, continuity, or patient expression.

**General guidance on how to incorporate or weave in SICG questions**

1. Follow content already introduced by patient. Questions should emerge in response to patient language, not as topic shifts or starters.
2. Use SICG domains as orienting frames, not prompts. Think in terms of domains (understanding, hopes, worries, trade-offs, priorities), not verbatim questions. Instead of asking about goals of care, attend to what the patient hopes for or fears losing.
3. Maintain tentativeness and remind patients that it is acceptable for patients to decline responding to SICG-aligned questions.
4. Prioritize clarification over exploration using reflections and summaries. Especially for topics that may be culturally sensitive or emotionally jarring for patients, avoid deepening or probing beyond what the patient has already introduced.

## What to avoid

PSCs should avoid:

- Introducing SICG questions early to “set the agenda.”
- Moving systematically through SICG domains or using the SICG as a structured conversation tool, reading aloud each question in sequence.
- Be seen using or referring to the SICG as though it were a script.
- Asking future-oriented questions when the patient is focused on the present or facing significant health-related anxieties.
- Framing SICG content as preparation for decisions the patient is not ready to make, especially if such decisions require clinical guidance.
- Using SICG questions to push clarity, acceptance, or alignment.

SICG questions should feel like a natural extension of what the patient is already saying or of where the conversation is already heading, not a change in the nature of the conversation.

## Structured reflective activities

Structured reflective activities, such as values card sorting, may be used selectively and optionally within supportive listening to help some patients find language for what matters to them when this is difficult to articulate through conversation alone. These activities are not essential components of the intervention and are not intended to drive the conversation. Instead, they function as **adjunct scaffolding tools** that can support expression, reflection, and orientation when patients indicate interest or may benefit from a more concrete starting point.

**Values card sorting** (appropriate for in-person sessions)

| Step | Actions |
| --- | --- |
| Offer cards | - Offer the set of values cards (see Appendix) and invite the patient to look through them at their own pace. - Reassure the patient that they do not need to understand or relate to every card. - Encourage them to set aside any cards that do not resonate. |
| Identify current values | - Invite the patient to select three to five values that best describe who they are today or what feels most important to them right now. |
| Identify aspirational values | - Next, invite the patient to select one to two values that reflect who they would like to be, or values they wish to embody more fully or intentionally - Emphasize that it is acceptable to choose none if nothing stands out, and that aspirational values are not about self-improvement. |
| Explore what these values mean | - Once values are selected, PSCs may invite gentle exploration, focusing on meaning rather than explanation or justification. Sample exploratory questions:   - “What does this value mean to you?”   - “When you chose this card, what came to mind?”   - “How does this value show up in your life, if you don’t mind sharing?”   - “What does living this value look like on an ordinary day?”   - “What would it mean to embody this a little more?”   - “What does this value say about who you are/ what is important to you?” |
| Closing the activity | - Check how the experience was for the patient - Affirm that the selections are not fixed or binding, and reiterate that values can be revisited or set aside in future sessions - Thank the patient for engaging in the activity |

**Continuity timeline**

| Step | Actions |
| --- | --- |
| Introduce the purpose | - Briefly explain that this activity is meant to help notice what has changed and what has stayed the same over time, rather than to analyze or evaluate the illness journey. - Emphasize that it can be kept light and does not need to cover everything. |
| Invite reflection on “before” | - Invite the patient to share a few words about who they were or what mattered to them before their illness, focusing on roles, interests, or qualities rather than events or losses. Allow the patient to choose how far back they wish to go. |
| Attend to the present | - Gently shift attention to the present moment, inviting reflection on what feels most salient or alive now. This may include changes, disruptions, or unexpected continuities. - Follow the patient’s lead and avoid pushing for coherence. |
| Notice continuities | - Invite the patient to reflect on what has remained, even if in an altered form. - This may include values, ways of relating, personal qualities, or sources of meaning. - Use tentative language and reflect back what the patient names. |
| Close the activity | - Bring the activity to a close by checking how the reflection felt and whether anything stands out. - Reinforce that identities and priorities can remain fluid, and that nothing shared is fixed. |

**Exploring what makes a day “good enough”**

| Step | Actions |
| --- | --- |
| Frame the activity | - Explain that this reflection is about understanding what makes a day feel manageable or okay, rather than perfect, idyllic, or memorable. - Emphasize that “good enough” looks different for everyone and may change from day to day. |
| Invite description | - Invite the patient to describe what a “good enough” day looks like for them at this point, focusing on sensations, moments, or interactions rather than achievements. |
| Reflect and clarify | - Listen for what the description reveals about values, needs, or priorities (e.g. rest, connection, dignity, autonomy). - Offer brief reflections using the patient’s own language to clarify what seems important in their description. (Use tentative phrasing and invite correction or elaboration.) |
| Close the activity | - Check how it was for the patient to talk about this, and whether it was helpful to think about a “good enough” day. Avoid turning the reflection into a goal or plan unless the patient explicitly invites this. |

# Goal setting and goal review

Goal setting is included in the PSC intervention as **a supportive and optional component**, not a requirement. Its purpose is to help patients who wish to do so orient themselves toward something meaningful, even in the context of illness-related uncertainty, loss, or disruption.

Research from positive psychology and behavioural science suggests that working toward personally meaningful goals can support well-being by fostering:

- A sense of agency and direction
- Feelings of purpose and engagement
- Anchoring in the present

The benefits of goal pursuit are most evident where goals are self-chosen, flexible, and aligned with the values of the patient. Goals may be practical, relational, emotional, or symbolic. They need not be ambitious, measurable, or achieved to be meaningful.

## When to introduce goal setting

Goal setting in this intervention is entirely **preference-dependent**. Some patients find it helpful to work toward something tangible or meaningful; others may feel that focusing on goals is burdensome, irrelevant, or misaligned with how they are coping. Both responses are valid.

General guidelines:

- Goal setting should be introduced only if the patient expresses interest or openness
- PSCs should not assume that goal setting is beneficial for everyone
- The absence of a goal is not treated as disengagement, avoidance, or lack of motivation
- Patients may choose to pause, change, or abandon goals at any point

## Using Motivational Interviewing (MI)

Motivational Interviewing is a collaborative, respectful way of supporting patients to identify and pursue goals that are personally meaningful. In the PSC role, MI is not used to persuade or direct patients, but to elicit intrinsic motivation, explore ambivalence, and support goal clarification and sustained engagement. The table below outlines some principles and their practical implications for how PSCs may support patients in their goal pursuit.

| Principle | What this means in the context of PSC intervention |
| --- | --- |
| Partnership | Work *with* the patient, not *on* them. Invite shared decision-making. |
| Acceptance | Respect each patient’s autonomy, values, and readiness to change. |
| Compassion | Prioritize the patient’s wellbeing and what truly matters to them. |
| Evocation | Draw out the patient’s own reasons, goals, and strengths. |

## Reference questions to guide goal setting

The questions below are not intended to be used as a script or checklist to be worked through. They are offered as a flexible reference to support conversation, and should be drawn on selectively and strategically in response to patient cues.

| Conversational function | MI principle(s) | Reference questions |
| --- | --- | --- |
| Seeking permission and orienting patient | - Autonomy - Partnership | - “Would it be okay if we spent a bit of time talking about what matters to you right now, and whether there’s anything you might want to move toward?” |
| Eliciting direction or desire | - Evocation | - “What are you finding yourself hoping for at the moment, even in small ways?” - “I’ve heard how [value or source of meaning] is important to you. What’s something that might help you connect with [value or source of meaning]?” - “What would you like things to look or feel a little more like, if anything?” |
| Clarifying meaning and values | - Evocation - Acceptance | - “What makes that important to you?” - “What does that say about what you care about?” - “When you think about this/ when you are reminded of this, what do you feel?” - “It sounds like being able to [activity or goal] connects to [value or source of meaning].” |
| Exploring feasibility gently | - Compassion - Autonomy | - “What feels most doable for you now?” - “Which part of this feels like a fit for you at the moment?” - “Even a small step could be meaningful. There’s no need to do or achieve something big. What’s a small step that you feel you can take towards [goal]?” |
| Scaling to elicit change talk | - Evocation | - “On a scale from 0 to 10, with 10 being very important and 0 being not important at all, how important is this for you? What makes it that number and not a lower one like [lower number]?” - “On a scale from 0 to 10, with 10 being very feasible and 0 being impossible, how doable does this feel? What makes it that number and not a lower one like [lower number]?” - “What might help move it up even a little?” |
| Consolidation | - Partnership - Autonomy | - “Let me check if I’ve understood you correctly: [brief summary]. Did I get that right?” - “Given everything you’ve said, what feels like the right step for you, if any?” - “Would it feel helpful just to think about a small step, or would you rather leave it for now?” |

## Goal review

Goal review is intended to support reflection and continuity, not to assess progress or performance. When revisiting goals, PSCs should adopt a curious, compassionate, and non-judgmental tone, focusing on the patient’s **experience of trying** rather than on outcomes achieved.

What to avoid during goal reviews:

- Evaluating success or failure
- Framing lack of progress as avoidance, low motivation, or resistance
- Repeatedly revisiting goals when the patient shows reluctance or fatigue
- Conveying disappointment, surprise, or corrective intent

As a general principle, consider goal review as being about accompanying the patient in their experience, not holding them accountable for their actions.

## Reference questions to guide goal review

As above, the questions and prompts are intended strictly for the PSC’s consideration only.

| Conversational function | Reference questions/ prompts |
| --- | --- |
| Check in on progress | - “How have things been going with your goal since we last spoke?”/ “Were you able to take any steps toward what we talked about?” - “What felt easier or more possible? What felt harder?” - “What surprised you in trying this out?” |
| Affirm effort and notice change | - “That sounds like a meaningful step. You gave it a try even though you weren’t sure how it would go.” - “You’ve put a lot of thought into this.” |
| Explore barriers and setbacks | - “Did anything get in the way? How did you respond?” - “Many people find some weeks harder than others. What was this week like for you?” - “If someone else were to do [x] in spite of [y], what would you say about them?”/ “What does that say about you?” |
| Reframe ambivalence (*if applicable*) | - “It makes sense to feel unsure about this. Part of you wants to make a change, and part of you might be tired, or afraid it won’t help.” - “If it doesn’t feel like the right time for that goal, would something else feel more doable?” |
| Adjust goal or set new goal *(if needed)* | - “Maybe we can tweak the goal so it fits better with how you’re feeling now. What would feel manageable this week?” - “What’s one small thing you feel confident in working towards?”/ “What’s one thing you think you can do differently this time around?” |

# Consolidation and closure

The conclusion of the PSC intervention should be anticipated and communicated ahead of time. PSCs should indicate one session in advance that the programme is approaching its end, allowing patients time to process the transition, raise questions, or plan ahead. This advance notice helps prevent feelings of loss, abandonment, or incompletion. It is generally not ideal to introduce new material, goals, or emotionally demanding topics in such a session, as the goal is to provide **integration and closure**, not elicit insight or inspire change.

## General guidelines

In the final session, PSCs should aim to:

- Gently review what the patient has found helpful, meaningful, or supportive during the intervention
- Reflect on themes, strengths, or insights the patient has identified
- Acknowledge the work the patient has done, and provide a sense of closure.
- Discuss how the patient can be supported going forward, including existing clinical or supportive care relationships

Where appropriate, PSCs may share their work contact details with patients and invite them to reach out if they wish to seek further support within the scope of the intervention. For longer-term or ongoing support needs, patients should be guided towards appropriate psychosocial or supportive care services.

## Reference statements and questions

The following are optional prompts to support consolidation. They are not a script or checklist and should be used responsively.

| Conversational function | Reference questions/ prompts |
| --- | --- |
| Affirmation without evaluation | - “We’ve covered a number of things over our sessions. I’d like to take a moment to reflect on what has felt most helpful for you. There’s no right or wrong answer here. I’m simply interested in what stands out to you.” - “Looking back, what feels most meaningful or useful from our conversations?” |
| Acknowledging effort and strengths | - “I’ve noticed the care and thought you’ve put into reflecting on these things.” - “What are you most aware of about yourself now, compared to when we first met?” |
| Supporting continuity | - “Although our sessions are coming to an end, the things you’ve reflected on don’t disappear. You’ll continue to have support through your care team.” - “What, if anything, feels important for you to carry forward from this?” |
| Checking emotional impact | - “How are you feeling right now as we come towards the end?” - “It’s okay if there are mixed feelings about this coming to an end.” - “Is there anything that would help you feel more settled before we finish today?” |
| Remaining present | - “I want to be mindful not to open anything new right at the end.” - “We don’t need to solve or revisit everything today.” - “Is there anything that you’d like to focus on today as we wrap up?” |

# Documentation templates

## PSC-patient session template

| DRAFT: Case for discussion with [clinical supervisor] (delete upon review with supervisor)  **PSC SIC call/ in-person session** (delete as needed)  Called/ Met patient @ (time) as part of routine check-in  Speaks (language)  Time start of session:  Time end of session:  ===  Introductory meeting (delete for follow-up sessions)  - Introduced role of patient support coordinator  - Provided overview of intervention (program logistics and structure)  - Explained to patient that sessions will be documented in the system as these are important information & will allow healthcare team to know patient better. Patient reassured of patient confidentiality.  =======================  DT score: ___/10  Problems faced:  1.[Issue header]  - [Describe the problem/issue]  - Advice/ intervention provided  > [Offered SCN referral]: accepted/ declined (delete as needed)  >Offered MSW/ psychologist referral: delete as needed  > Other advice offered to patient from PSC:  > Educational resources provided to patient:  > Useful contact numbers provided  > Patient advised to seek medical attention if pain/symptom worsens or new symptoms occur  2. [Issue header]  … (as above)  =======================  Other updates or issues faced  1.[Issue header]  - [Describe the problem/issue]  - Advice/ intervention provided  > [Offered SCN referral]: accepted/ declined (delete as needed)  >Offered MSW/ psychologist referral: delete as needed  > Other advice offered to patient from PSC:  > Educational resources provided to patient:  > Useful contact numbers provided  > Patient advised to seek medical attention if pain/symptom worsens or new symptoms occur  2. [Issue header]  … (as above)  === SIC discussion ===  *1. Illness understanding*  -  *2. Informational preferences*  -  *3. Current or future priorities*  -  *4. Concerns and worries*  -  *5. Sources of strength and meaning*  -  *6. Family and social support structure*  -  *7. Overall concept of “being well” or “quality of life”*  - |
| --- |

## Email update to clinician

| Dear Dr [Dr’s Name],  I am writing to provide a brief update on your patient, **[Full Name, NRIC]** whom I’ve been supporting as part of the ongoing serious illness communication and supportive care initiative.  Over the course of **[X] sessions**, we explored the following areas:   1. Headline summary of patient’s reflections, values, and priorities    1. The patient identified the following as **personally meaningful goals or priorities**: [e.g. “Remaining independent at home”/ “Attending daughter’s graduation”/ “Staying active and mobile”]    2. **Values or themes** that emerged: [e.g. Family connection, maintaining dignity, clear communication, not being a burden]    3. **Concerns** raised by patient: [e.g. Prognosis, fear of recurrence, treatment burden towards the end of life, confusion about treatment intent]   For further details, please see Appendix below.   1. Support provided    1. Psychoeducation on [e.g. fatigue management, coping with uncertainty, communication with family or healthcare providers]    2. Support with goal setting and pursuit: [Patient’s goal, why the goal is personally meaningful to patient, and how patient fared in terms of goal pursuit]    3. Explored patient’s illness experience, roles, and emotional coping 2. Referrals and follow-ups (delete as appropriate)    1. [e.g. Patient referred to Psychosocial Services for further support with anxiety]    2. [e.g. Suggested follow-up with Supportive Care Nurse regarding pain management]   Please let me know if you would like further details or if I can support any specific follow-up conversations.  Thank you.  Best regards  [PSC name]  **Appendix**  This section provides supplementary details on the patient’s reflections that may inform future conversations or care planning.   1. Reflections on illness journey and identity    1. [Patient’s reflections]    2. [Patient’s reflections] 2. Key values expressed    1. [Value 1] – [Why this value matters to the patient]    2. [Value 2] – [Why this value matters to the patient]    3. [Value 3] – [Why this value matters to the patient]    4. [Where applicable, indicate how the abovementioned values are in conflict or shaped patient’s illness experiences] 3. Hopes and worries    1. [Patient’s reflections]    2. [Patient’s reflections]    3. [Patient’s reflections] 4. Quality of life    1. Described a good day as:    2. What ideal quality of life means: |
| --- |
